# Supplementary material
Source: PubMed Central journal article supplement (PMC6143078)
Supplement: jamacardiol-3-729-s001.pdf [file jamacardiol-3-729-s001.pdf]

## Supplementary Online Content

Khera R, Valero-Elizondo J, Okunrintemi V, et al. Association of out-of-pocket annual health expenditures with financial hardship in low-income adults with atherosclerotic cardiovascular disease in the United States. *JAMA Cardiol*. Published online July 3, 2018. doi:10.1001/jamacardio.2018.1813

**eResults.** Sensitivity analyses

**eFigure 1.** Proportion of low-income and mid/high-income families with a member with atherosclerotic cardiovascular disease

**eFigure 2.** Median family income by calendar-year in the mid/high-income and low-income families

**eFigure 3.** Mean out-of-pocket expenses across categories of healthcare, by family income group

**eFigure 4.** Mean healthcare expenses in low-income families incurring a catastrophic financial burden from out-of-pocket health costs (A), and relative spending on member with ASCVD among these families (B)

**eFigure 5.** Mean healthcare expenses across categories in low-income families

**eFigure 6.** Trends in overall rates of high and catastrophic financial burden from out-of-pocket health expenditures, by insurance group

**eFigure 7.** Predictors for catastrophic financial burden from out-of-pocket health expenditures in low-income families

**eFigure 8.** Sensitivity analysis: Risk-adjusted odds ratio for high and catastrophic financial burden from out-of-pocket health expenses in low vs mid/high income families after adjusting for characteristics of members without atherosclerotic cardiovascular disease

**eFigure 9.** Sensitivity analysis: Trends in rates of high and catastrophic financial burden from out-of-pocket health expenditures, by income group

**eFigure 10.** Sensitivity Analysis: Trends in rates of high and catastrophic financial burden from out-of-pocket health expenditures, by access to insurance

**eFigure 11.** Sensitivity Analysis: Trends in rates of high and catastrophic financial burden from out-of-pocket health expenditures, by insurance group

**eFigure 12.** Sensitivity Analysis: Predictors for catastrophic financial burden from out-of-pocket health expenditures in low-income families

**eTable 1.** Proportional out-of-pocket spending on different categories of healthcare services, by income group

**eTable 2.** Predictors for catastrophic financial burden from out-of-pocket health expenditures in low-income families

This supplementary material has been provided by the authors to give readers additional information about their work.

## **eResults.** Sensitivity analyses

In a set of sensitivity analyses, we also included families with very low incomes, such that their food expenses exceeded their incomes and all healthcare expenses would be considered catastrophic in this group. These analyses indicate that low-income families may be even more prone to financial adversity from out-of-pocket than suggested in our primary analyses. With these less conservative study criteria, compared with the mid/high-income families, low-income families had nearly 6-fold higher odds of experiencing high financial burden (31.2% vs 7.0%, OR 6.04; 95% CI 5.36, 6.80) and a nearly 20-fold higher odds of experiencing catastrophic financial burden from out-of-pocket health costs (18.7% vs 1.1%, OR 19.78; 95% CI 16.03, 24.41). This represents an average 2.5 million low-income and 878 thousand mid/high income families with high financial burden, and 1.5 million low-income and 144 thousand mid/high-income families with catastrophic financial burden, respectively, each year. The temporal trends in these expenses, and the association across insurance groups was consistent with our primary analyses (**eFigures 5-8**).

**eFigure 1.** Proportion of low-income and mid/high-income families with a member with atherosclerotic cardiovascular disease

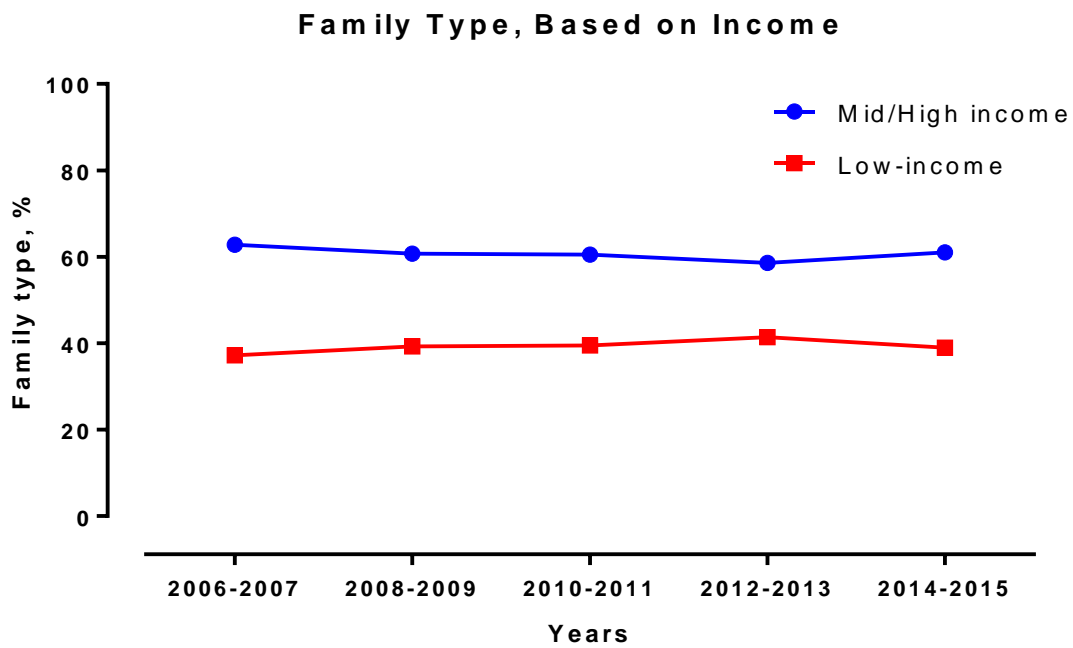

**eFigure 2.** Median family income by calendar-year in the mid/high-income and low-income families

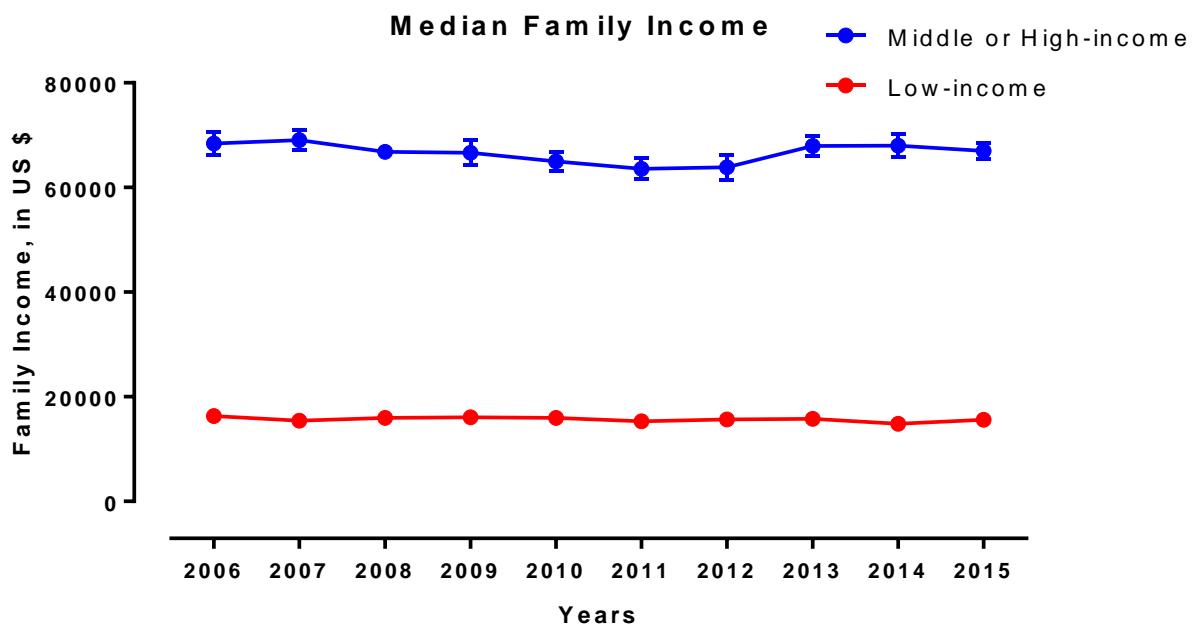

**eFigure 3.** Mean out-of-pocket expenses across categories of healthcare, by family income group

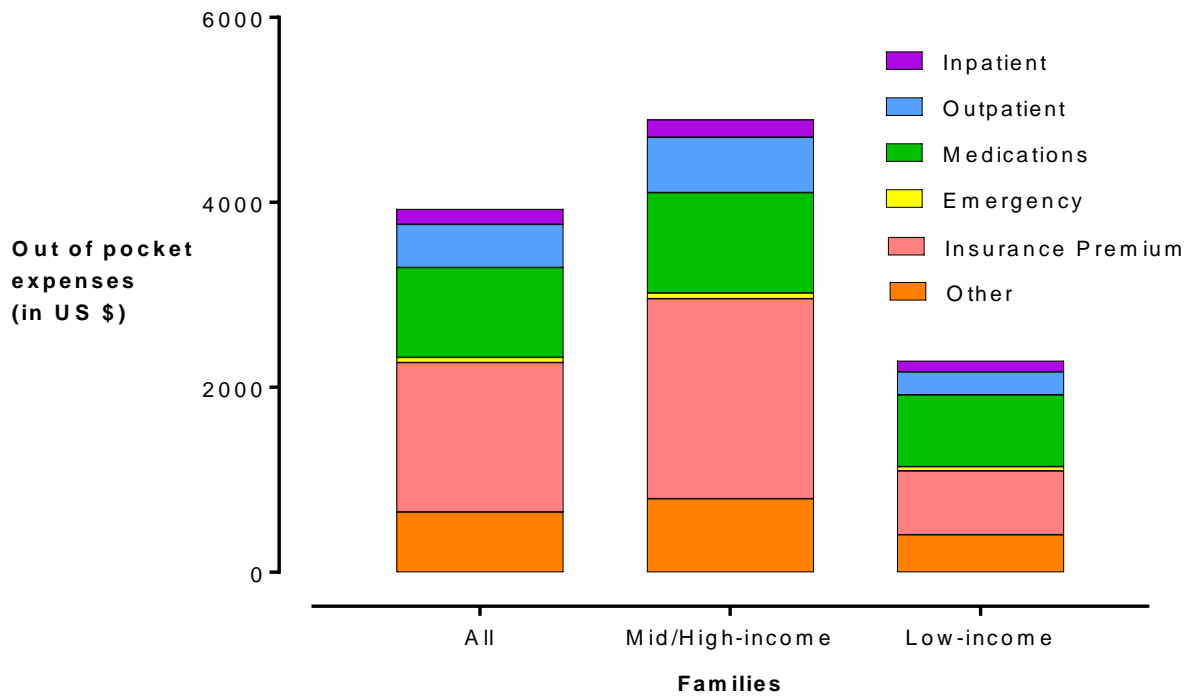

**eFigure 4.** Mean healthcare expenses in low-income families incurring a catastrophic financial burden from out-of-pocket health costs (A), and relative spending on member with ASCVD among these families (B)

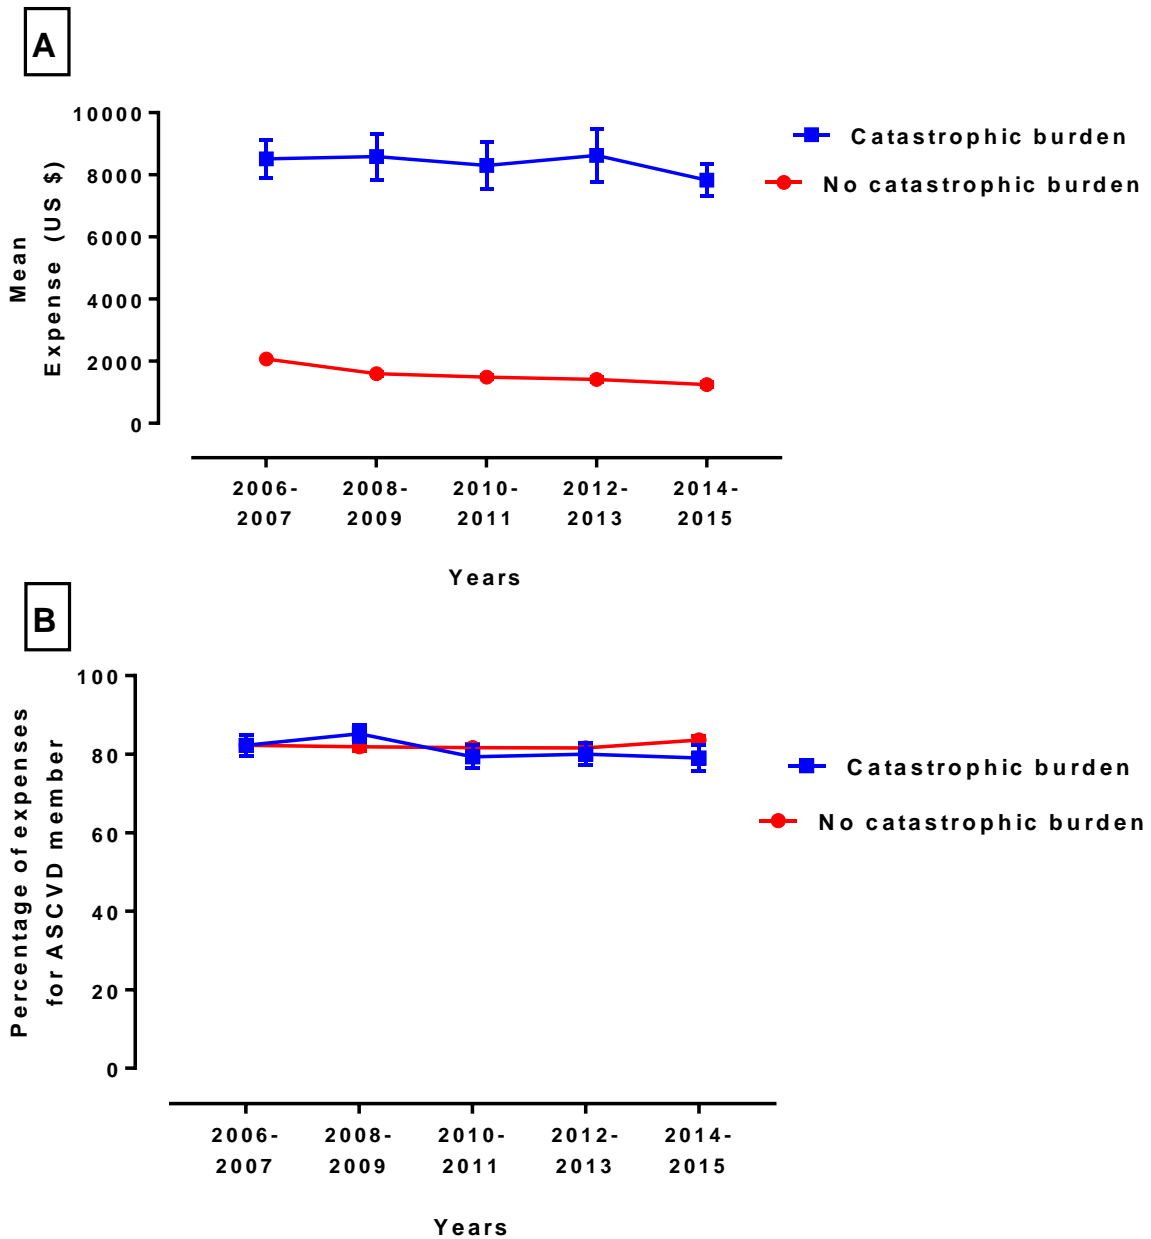

**eFigure 5.** Mean healthcare expenses across categories in low-income families

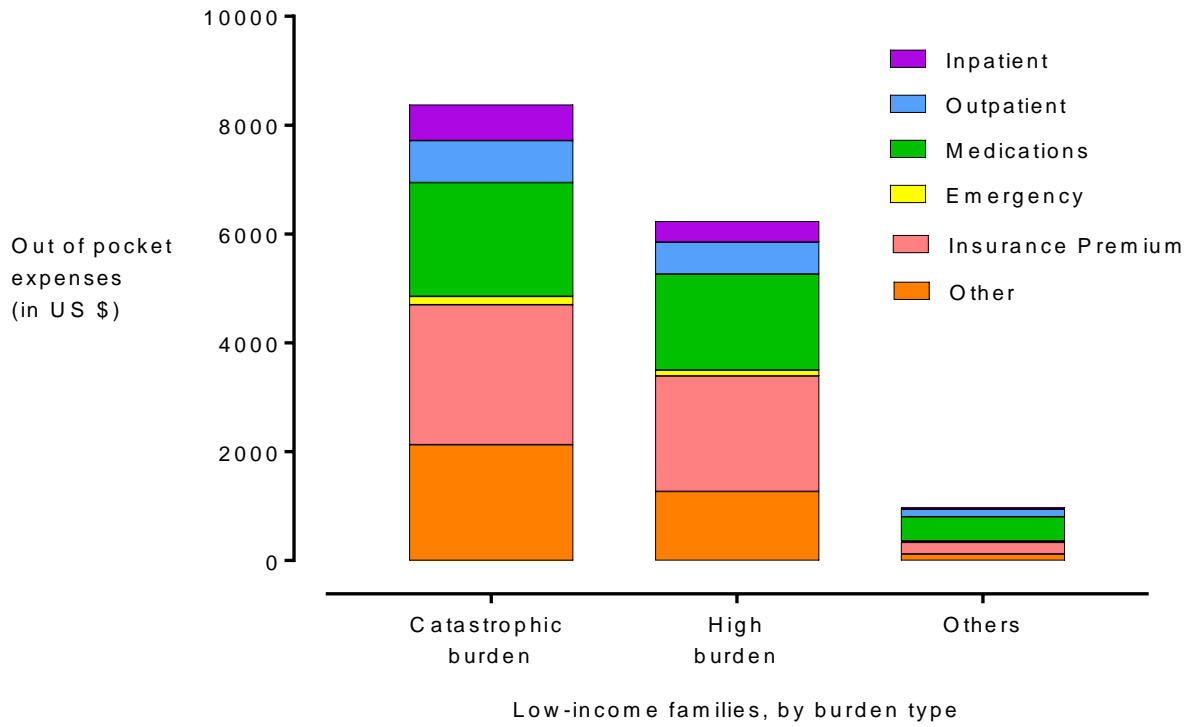

**eFigure 6.** Trends in overall rates of high and catastrophic financial burden from out-of-pocket health expenditures, by insurance group

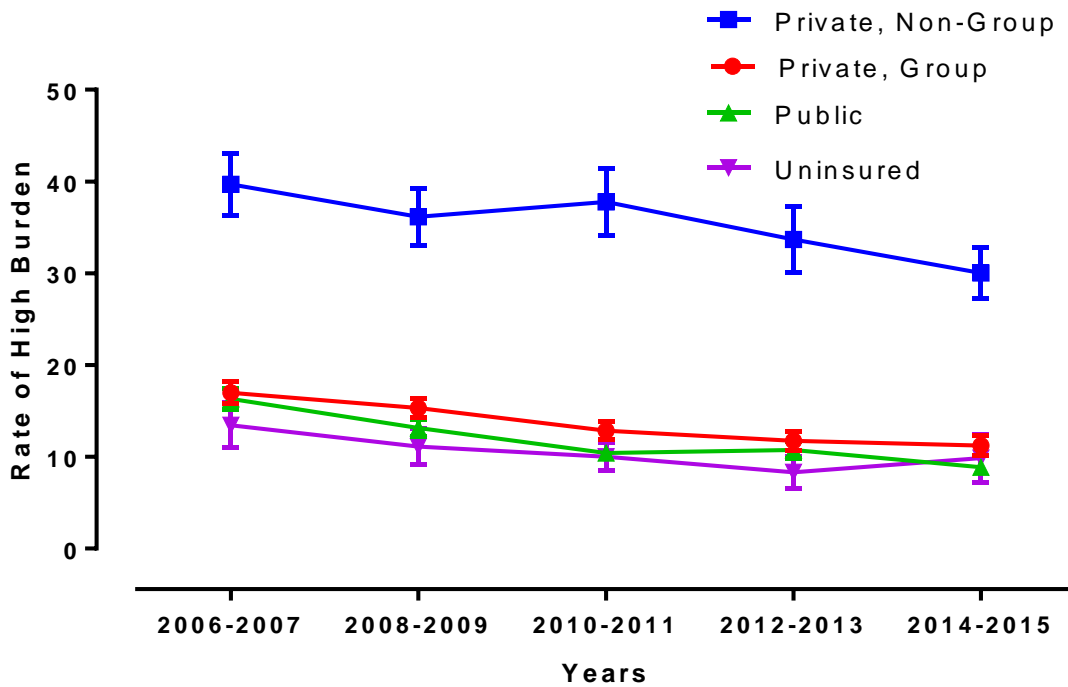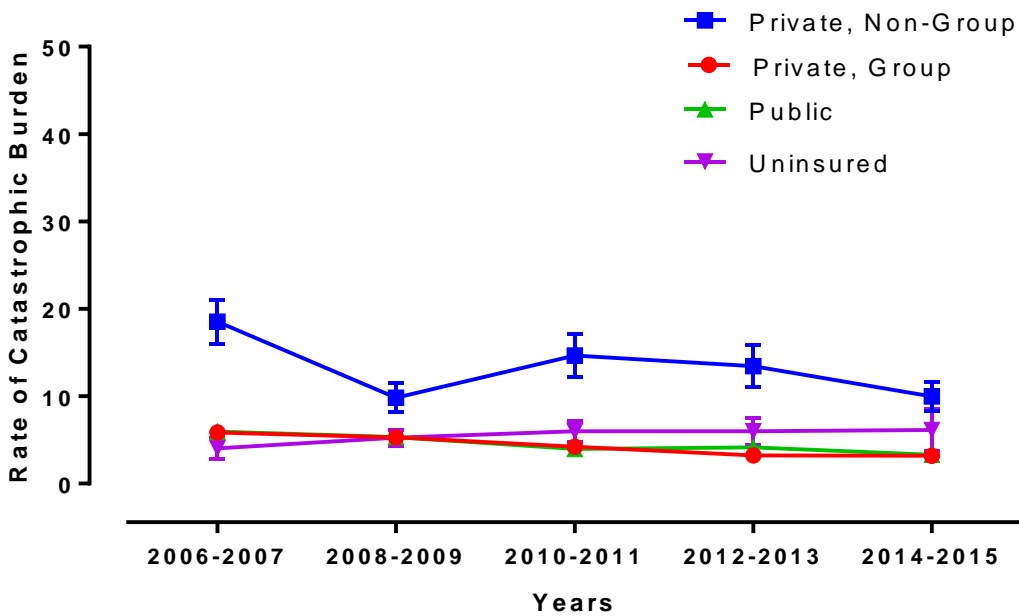

(A) High Financial Burden and (B) Catastrophic Financial Burden



**eFigure 7.** Predictors for catastrophic financial burden from out-of-pocket health expenditures in low-income families

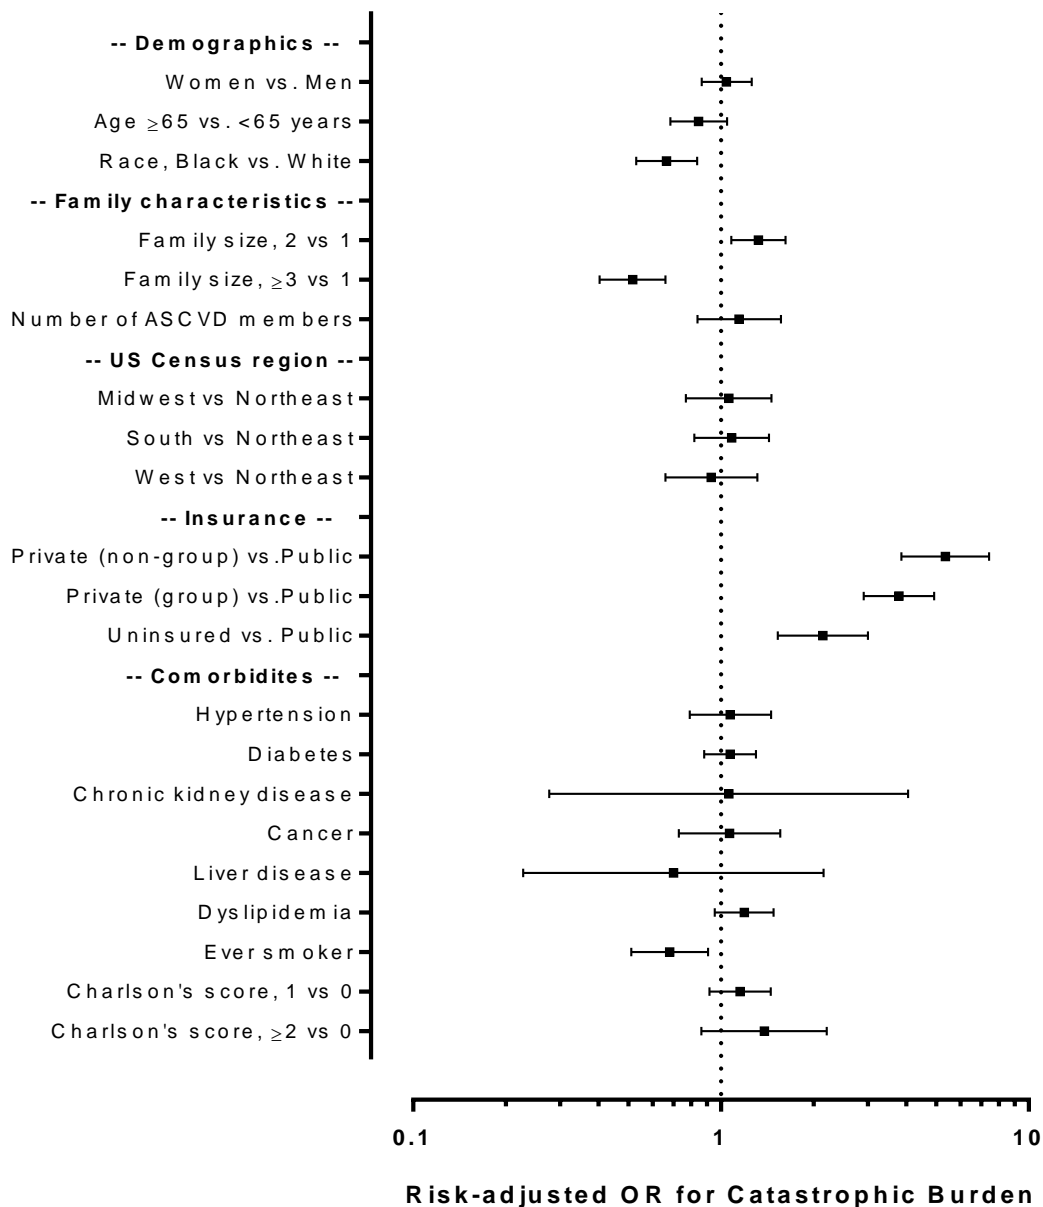

Bars represents risk-adjusted odds-ratio (OR) and 95% confidence intervals from a survey-specific logistic regression model with a model c-statistic of 0.73. Demographics represent characteristics of the oldest person with atherosclerotic cardiovascular disease (ASCVD) in the family. The modified Charlson's score included here represents comorbidity burden in excess of atherosclerotic cardiovascular disease, to avoid collinearity with the exposure.<sup>12</sup>

**eFigure 8.** Sensitivity analysis: Risk-adjusted odds ratio for high and catastrophic financial burden from out-of-pocket health expenses in low vs mid/high income families after adjusting for characteristics of members without atherosclerotic cardiovascular disease (characteristics listed in eTable 2)

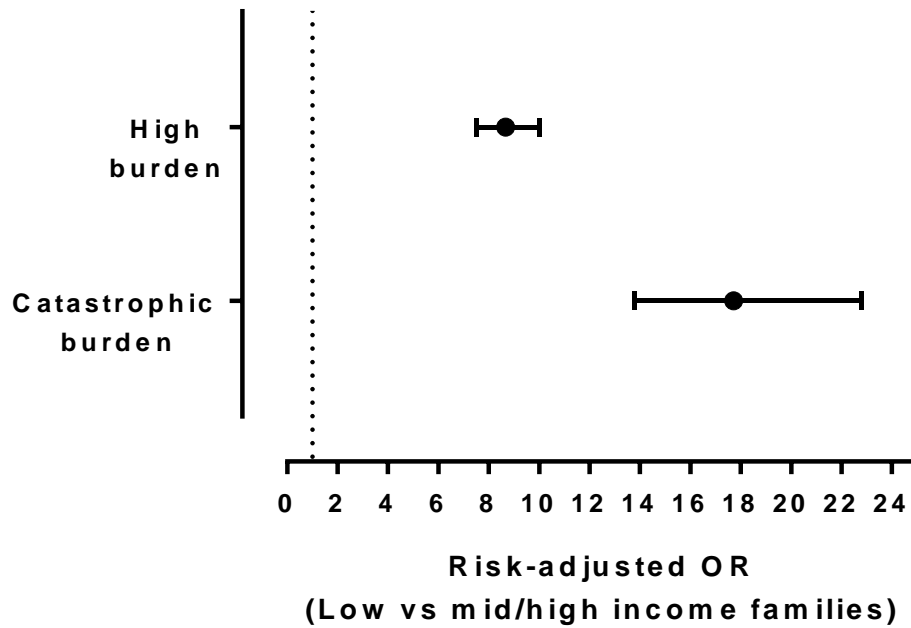

Dotted line represents an odds ratio of 1.

**eFigure 9. Sensitivity analysis:** Trends in rates of high and catastrophic financial burden from out-of-pocket health expenditures, by income group

**A**

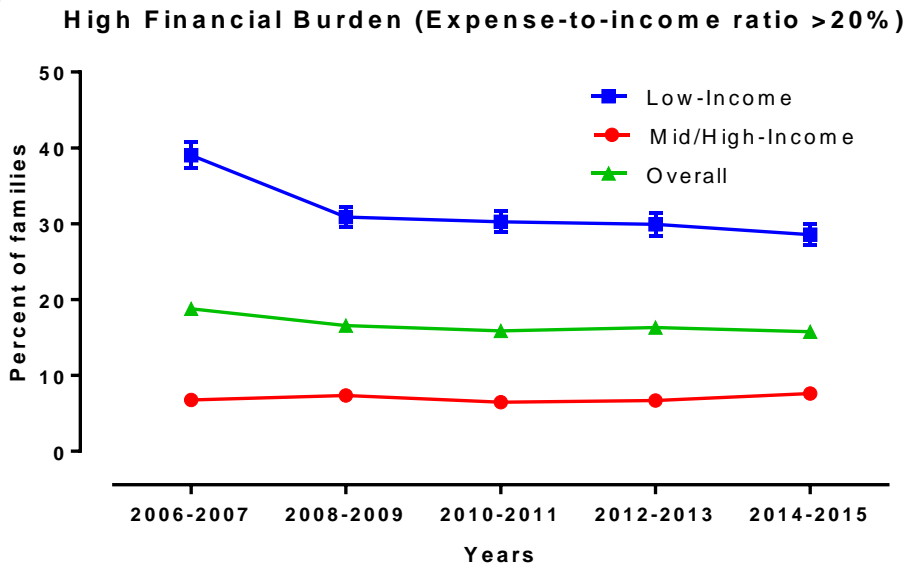

**B**

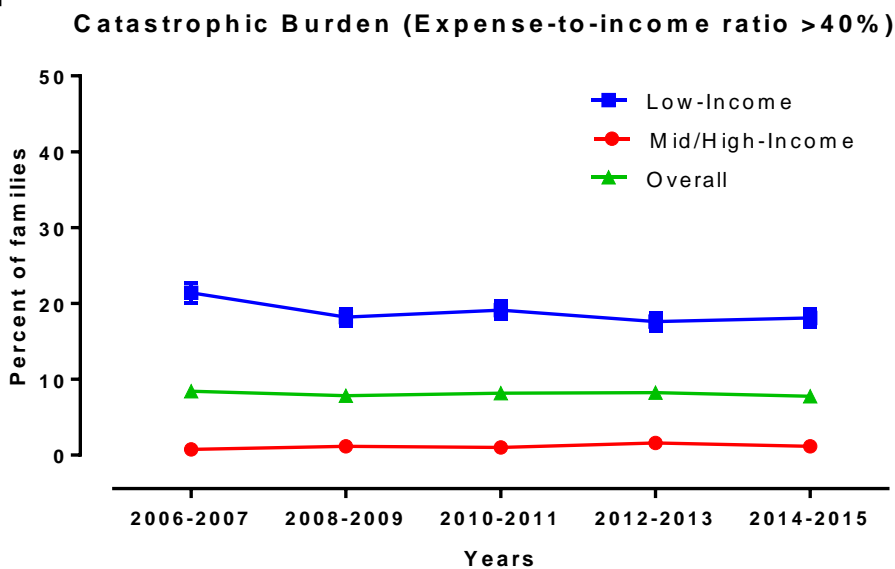

Sensitivity analyses including individuals with subsistence expenses exceeding annual income. (A) High Financial Burden, and (B) Catastrophic Financial Burden.

**eFigure 10. Sensitivity Analysis:** Trends in rates of high and catastrophic financial burden from out-of-pocket health expenditures, by access to insurance

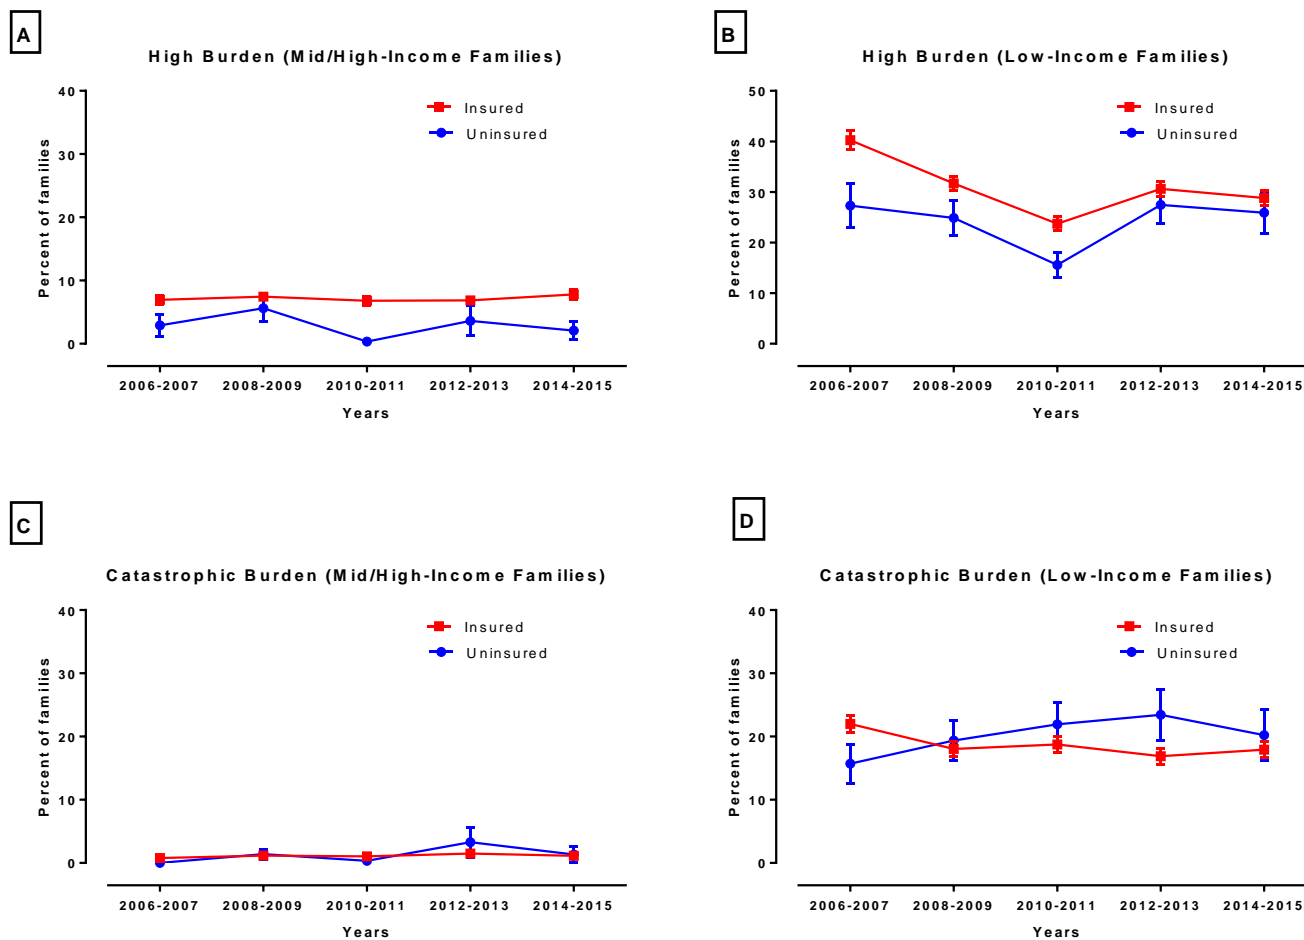

Sensitivity analyses including individuals with subsistence expenses exceeding annual income. High Financial Burden in (A) mid/high-income and (B) low-income families, and Catastrophic Financial Burden in (C) mid/high-income and (D) low-income families.

**eFigure 11. Sensitivity Analysis:** Trends in rates of high and catastrophic financial burden from out-of-pocket health expenditures, by insurance group

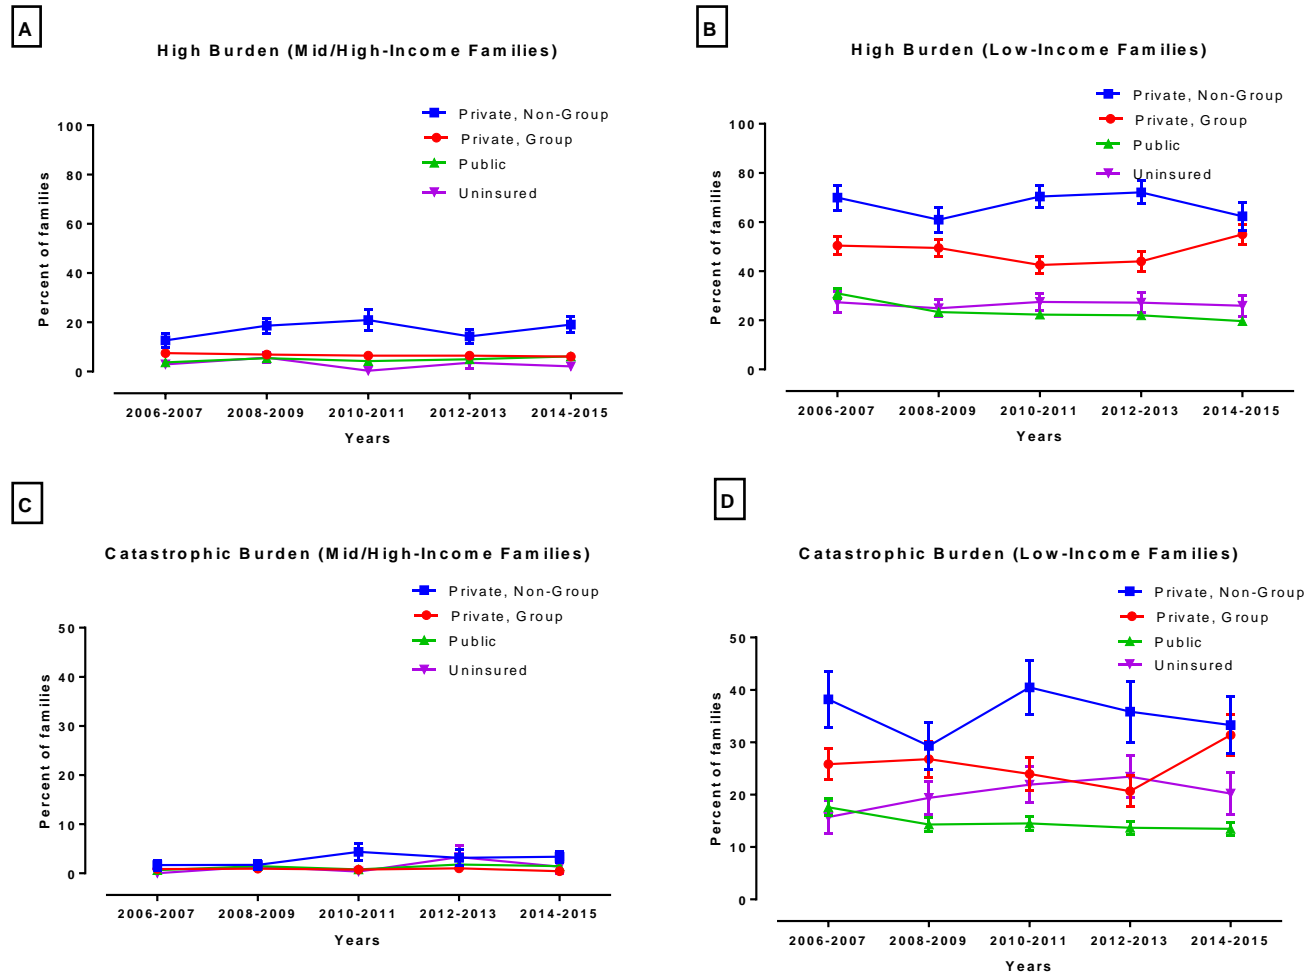

Sensitivity analyses including individuals with subsistence expenses exceeding annual income. High Financial Burden in (A) mid/high-income and (B) low-income families, and Catastrophic Financial Burden in (C) mid/high-income and (D) low-income families.

**eFigure 12. Sensitivity Analysis:** Predictors for catastrophic financial burden from out-of-pocket health expenditures in low-income families

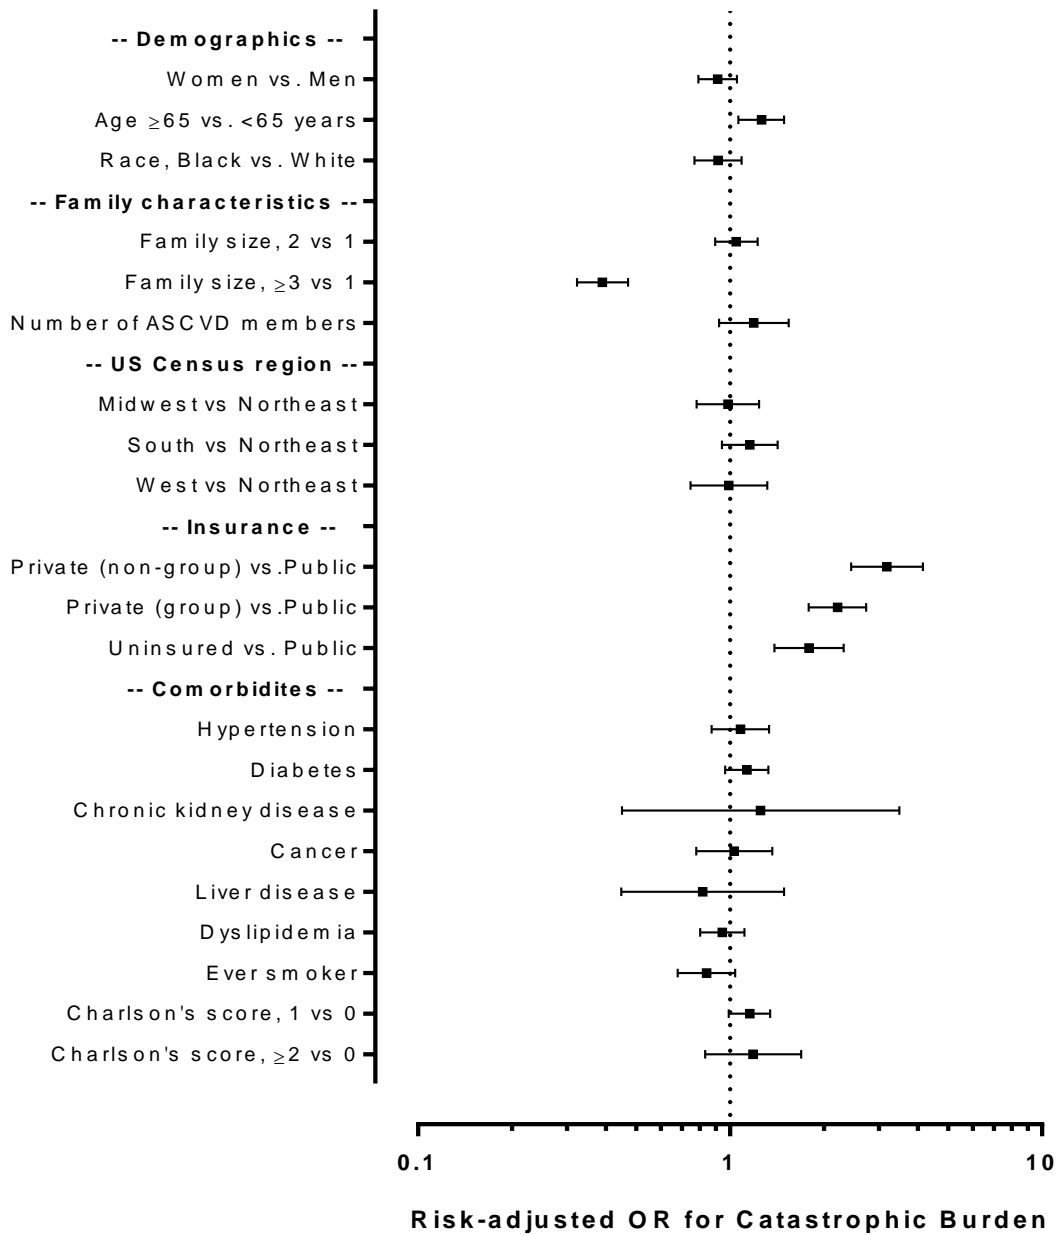

Bars represents risk-adjusted odds-ratio (OR) and 95% confidence intervals from a survey-specific logistic regression model. The modified Charlson's score included here represents comorbidity burden in excess of atherosclerotic cardiovascular disease.

**eTable 1.** Proportional out-of-pocket spending on different categories of healthcare services, by income group

| <b>Mid/High income families</b>       | <b>2006-2007</b> | <b>2008-2009</b> | <b>2010-2011</b> | <b>2012-2013</b> | <b>2014-2015</b> |
|---------------------------------------|------------------|------------------|------------------|------------------|------------------|
| Total out-of-pocket expenses, in US\$ | 5292 (171)       | 5039 (134)       | 4567 (126)       | 4869 (188)       | 4801 (143)       |
| Family insurance premiums             | 32.8 (0.9)       | 33.2 (1.1)       | 33.7 (1)         | 37.1 (1.1)       | 38.2 (1.1)       |
| <b>Member(s) with ASCVD</b>           |                  |                  |                  |                  |                  |
| Inpatient                             | 1.7 (0.2)        | 2.0 (0.2)        | 2.0 (0.2)        | 1.7 (0.2)        | 2.3 (0.2)        |
| Outpatient                            | 8.6 (0.4)        | 11.0 (0.5)       | 10.1 (0.5)       | 10 (0.5)         | 10.7 (0.4)       |
| Medications                           | 27.9 (0.8)       | 25.5 (0.8)       | 27 (0.8)         | 22.7 (0.7)       | 20.6 (0.8)       |
| Emergency services                    | 0.7 (0.1)        | 0.7 (0.1)        | 0.8 (0.1)        | 1.0 (0.2)        | 0.9 (0.2)        |
| Others                                | 9.8 (0.5)        | 9.7 (0.5)        | 9 (0.5)          | 9.8 (0.5)        | 10.8 (0.6)       |
| <b>Member(s) without ASCVD</b>        |                  |                  |                  |                  |                  |
| Inpatient                             | 0.6 (0.1)        | 0.6 (0.1)        | 0.7 (0.1)        | 0.8 (0.2)        | 0.6 (0.1)        |
| Outpatient                            | 5.2 (0.3)        | 6.5 (0.3)        | 6.9 (0.5)        | 6.4 (0.3)        | 7.6 (0.5)        |
| Medications                           | 11.9 (0.6)       | 10 (0.6)         | 9.6 (0.5)        | 9.7 (0.5)        | 7.7 (0.4)        |
| Emergency services                    | 0.6 (0.1)        | 0.5 (0.1)        | 0.3 (0.1)        | 0.5 (0.1)        | 0.5 (0.1)        |
| Others                                | 7.3 (0.5)        | 8 (0.5)          | 6.8 (0.5)        | 7.4 (0.5)        | 6.9 (0.5)        |
| <b>Low-income families</b>            |                  |                  |                  |                  |                  |
| Total out-of-pocket expenses          | 2937 (132)       | 2412 (129)       | 2192 (107)       | 2057 (135)       | 1899 (107)       |
| Family insurance premiums             | 14.4 (1)         | 14.4 (0.8)       | 13.9 (0.9)       | 14.7 (1)         | 14.2 (1.1)       |
| <b>Member(s) with ASCVD</b>           |                  |                  |                  |                  |                  |
| Inpatient                             | 2.3 (0.3)        | 2.5 (0.3)        | 2.7 (0.3)        | 2.6 (0.4)        | 2.1 (0.3)        |
| Outpatient                            | 8.8 (0.5)        | 11.7 (0.6)       | 10.1 (0.5)       | 11.4 (0.6)       | 13.3 (0.6)       |
| Medications                           | 50.9 (1.2)       | 45.4 (1.1)       | 49.7 (1.2)       | 45 (1.2)         | 44.8 (1.3)       |
| Emergency services                    | 1 (0.1)          | 1.8 (0.2)        | 1.6 (0.2)        | 2.7 (0.3)        | 1.6 (0.3)        |
| Others                                | 8.5 (0.6)        | 10.1 (0.8)       | 7.9 (0.5)        | 9.8 (0.8)        | 11.6 (0.7)       |
| <b>Member(s) without ASCVD</b>        |                  |                  |                  |                  |                  |
| Inpatient                             | 1.2 (0.3)        | 0.8 (0.3)        | 1.1 (0.3)        | 1.0 (0.3)        | 0.5 (0.2)        |
| Outpatient                            | 4.7 (0.4)        | 6.8 (0.6)        | 6.8 (0.5)        | 6.1 (0.5)        | 6.6 (0.6)        |
| Medications                           | 18.5 (1.2)       | 16.3 (0.9)       | 15.7 (0.9)       | 14.7 (1.0)       | 13.8 (1)         |
| Emergency services                    | 1.1 (0.3)        | 1.5 (0.3)        | 0.9 (0.2)        | 1.8 (0.4)        | 0.6 (0.2)        |
| Others                                | 5.9 (0.7)        | 5.9 (0.7)        | 6.5 (0.6)        | 5.8 (0.7)        | 5.9 (0.6)        |

**eTable 2.** Predictors for catastrophic financial burden from out-of-pocket health expenditures in low-income families

|                                         | <b>Odds ratio and 95% confidence limits</b> |             |             |
|-----------------------------------------|---------------------------------------------|-------------|-------------|
|                                         | Odds ratio                                  | Lower limit | Upper limit |
| <b>Demographics</b>                     |                                             |             |             |
| Age ≥65 vs. <65 years                   | 0.74                                        | 0.58        | 0.93        |
| Women vs. Men                           | 0.99                                        | 0.80        | 1.22        |
| Race, Black vs. White                   | 0.55                                        | 0.43        | 0.72        |
| Race, Others vs White                   | 0.53                                        | 0.30        | 0.94        |
| <b>Family characteristics</b>           |                                             |             |             |
| Family size, ≥3 vs 1                    | 1.33                                        | 1.02        | 1.74        |
| Family size, 2 vs 1                     | 0.96                                        | 0.67        | 1.36        |
| Number of members with ASCVD            | 2.12                                        | 1.47        | 3.05        |
| <b>US census region of residence</b>    |                                             |             |             |
| Midwest vs Northeast                    | 1.15                                        | 0.82        | 1.61        |
| South vs Northeast                      | 1.15                                        | 0.84        | 1.56        |
| West vs Northeast                       | 1.07                                        | 0.73        | 1.56        |
| <b>Insurance</b>                        |                                             |             |             |
| Private (group) vs. Public              | 6.78                                        | 5.04        | 9.11        |
| Private (non-group) vs. Public          | 8.59                                        | 5.88        | 12.57       |
| Uninsured vs. Public                    | 2.52                                        | 1.74        | 3.65        |
| <b>Financial characteristics</b>        |                                             |             |             |
| Percentage spending non-ASCVD members   | 1.00                                        | 1.00        | 1.01        |
| Total family income (log-scale)         | 0.09                                        | 0.07        | 0.11        |
| <b>Comorbidities, ASCVD members</b>     |                                             |             |             |
| Charlson's score, 1 vs 0                | 1.07                                        | 0.83        | 1.37        |
| Charlson's score, ≥2 vs 0               | 1.20                                        | 0.67        | 2.16        |
| Ever smoker                             | 0.65                                        | 0.48        | 0.88        |
| Dyslipidemia                            | 1.17                                        | 0.91        | 1.50        |
| Hypertension                            | 1.00                                        | 0.72        | 1.38        |
| Diabetes                                | 1.06                                        | 0.85        | 1.31        |
| Liver disease                           | 0.73                                        | 0.23        | 2.32        |
| Chronic kidney disease                  | 0.95                                        | 0.26        | 3.54        |
| Cancer                                  | 1.27                                        | 0.81        | 2.00        |
| <b>Comorbidities, non-ASCVD members</b> |                                             |             |             |
| Charlson's score, 1 vs 0                | 1.10                                        | 0.67        | 1.81        |
| Charlson's score, ≥2 vs 0               | 1.24                                        | 0.55        | 2.79        |
| Ever smoker                             | 1.37                                        | 0.89        | 2.13        |
| Dyslipidemia                            | 1.15                                        | 0.82        | 1.61        |
| Hypertension                            | 1.78                                        | 1.18        | 2.66        |
| Diabetes                                | 1.11                                        | 0.78        | 1.59        |



|               |      |      |      |
|---------------|------|------|------|
| Liver disease | 1.60 | 0.89 | 2.88 |
| Cancer        | 1.37 | 0.66 | 2.84 |

In addition to the base model, this includes comorbidities among those without ASCVD and their spending on healthcare services. The modified Charlson's score included here represents comorbidity burden in excess of atherosclerotic cardiovascular disease (model c-statistic 0.82).
